## **Patterns of growth in childhood in relation to adult schooling attainment and IQ in 6 birth cohorts in low and middle-income countries: evidence from COHORTS**

Natalia E Poveda, Fernando P Hartwig, Cesar G Victora, Linda S Adair, Fernando C Barros, Santosh K Bhargava, Bernardo L Horta, Nanette R Lee, Reynaldo Martorell, Mónica Mazariegos, Ana M B Menezes, Shane A Norris, Linda M Richter, Harshpal Singh Sachdev, Alan Stein, Fernando C Wehrmeister, Aryeh D Stein, and COHORTS Group<sup>1</sup>

Affiliation(s):

**Nutrition and Health Sciences, Laney Graduate School, Emory University, Atlanta, GA, USA (NE Poveda MSc); Post-Graduate Program in Epidemiology, Federal University of Pelotas, Pelotas, Brazil and Medical Research Council Integrative Epidemiology Unit, University of Bristol, Bristol, UK (FP Hartwig PhD); Post-Graduate Program in Epidemiology, Federal University of Pelotas, Pelotas, Brazil (CG Victora MD, BL Horta PhD, AMB Menezes PhD, FC Wehrmeister PhD); Department of Nutrition, Gillings School of Global Public Health, University of North Carolina at Chapel Hill, Chapel Hill, NC, USA (LS Adair PhD); Universidade Católica de Pelotas, Pelotas, Brazil (FC Barros MD); Consultant Pediatrician and Founder New Delhi Birth Cohort, New Delhi, India (SK Bhargava MD); USC-Office of Population Studies Foundation, Inc, University of San Carlos – TC, Talamban, Cebu City, Cebu, Philippines (NR Lee PhD); Hubert Department of Global Health, Rollins School of Public Health, Emory University, Atlanta GA, USA (R Martorell PhD, AD Stein PhD); INCAP Research Center for the Prevention of Chronic Diseases (CIIPEC), Institute of Nutrition of Central America and Panama (INCAP), Guatemala City, Guatemala (M Mazariegos Sc.D); SAMRC Developmental Pathways for Health Research Unit, University of the Witwatersrand, Johannesburg, South Africa and Global Health Research Institute, School of Human Development and Health & NIHR Southampton Biomedical Research Centre, University of Southampton, UK (SA Norris PhD); DSI-NRF Centre of Excellence in Human Development, School of Public Health, University of the Witwatersrand, Johannesburg, South Africa (LM Richter PhD); Senior Consultant Pediatrics and Clinical Epidemiology, Sitaram Bhartia Institute of Science and Research, New Delhi, India (HS Sachdev MD); University of Oxford, Oxford, UK and**

**MRC/Wits Rural Public Health and Health Transitions Research Unit (Agincourt), School of Public Health, Faculty of Health Sciences, University of the Witwatersrand, Johannesburg, South Africa (A Stein FRCPsych)**

<sup>1</sup> Additional members of the COHORTS Group include: **Pelotas Birth Cohorts:** Natalia P Lima, Helen Goncalves, Bruna Goncalves C da Silva, Paula D de Oliveira, Joseph Murray; **Birth to Twenty Plus:** Feziwe Mpondo, Likhanyo Nyati; **New Delhi Birth Cohort:** Caroline HD Fall, Clive Osmond, Lakshmy Ramakrishnan, Sikha Sinha, Bhaskar Singh; **INCAP Nutrition Supplementation Trial Longitudinal Study:** Manuel Ramirez-Zea, Maria F. Kroker-Lobos; **Cebu Longitudinal Health and Nutrition Survey:** Isabelita Bas, Sonny Agustin Bechayda, Delia Carba, Tita Lorna Perez; **University of Oxford:** Charlotte Wray, Gaia Scerif

**Correspondence to:**

Aryeh D Stein, PhD

Rollins School of Public Health of Emory University

1518 Clifton Rd NE #7007

Atlanta GA 30322, USA

[Aryeh.stein@emory.edu](mailto:Aryeh.stein@emory.edu)

1 **Summary**

2

3 **Background** Growth faltering has been associated with poor intellectual performance. The  
4 relative strengths of associations between growth in early and in later childhood remain  
5 underexplored. We examined the association between growth in childhood and adolescence and  
6 adult human capital in five low- or middle-income countries (LMICs).

7

8 **Methods** We analyzed data from six prospective birth cohorts of five LMICs (Brazil,  
9 Guatemala, India, the Philippines, and South Africa). We assessed the associations of measures  
10 of height and relative weight at four ages (birth, at around age 2 years, mid-childhood (MC),  
11 adulthood), with two dimension of adult human capital (schooling attainment and IQ).

12

13 **Findings** In site- and sex-pooled analyses, size at birth and linear growth from birth to around 2  
14 years of age were positively associated with schooling attainment and adult IQ. Linear growth  
15 from age 2 years to MC and from MC to adulthood was not associated with higher school  
16 attainment or IQ. Change in relative weight in early childhood was not associated with either  
17 outcome. Relative weight in MC and in adulthood were inversely associated with schooling  
18 attainment but were not associated with adult IQ.

19

20 **Interpretation** Linear growth in the first 1,000 days is a predictor of schooling attainment and  
21 IQ in adulthood in LMICs. Linear growth in later periods was not associated with either of these  
22 outcomes. Changes in relative weight had inconsistent association with schooling and IQ in  
23 adulthood.

24

25 **Funding** Bill and Melinda Gates Foundation (OPP1164115)

26

27

28

29

30

31 **Research in context**

32

33 **Evidence before this study**

34 Early life growth faltering has been associated with poor cognitive and intellectual performance  
35 in childhood and poorer schooling outcomes in children and adults. There is a paucity of data  
36 about how growth in specific age intervals over the course of childhood and adolescence relates  
37 to attained schooling and adult cognitive performance.

38 We conducted a literature search using the terms (growth [Title/Abstract]) AND ((school  
39 [Title/Abstract] OR schooling [Title/Abstract]) AND (intelligence [Title/Abstract] OR IQ  
40 [Title/Abstract]) OR (human capital [Title/Abstract]) in Pubmed. The search yielded 536  
41 publications from 1965 to 2020. We screened titles and selected 31 publications that included  
42 linear growth and our outcomes of interest, namely school attainment and intelligence quotient  
43 (IQ). Additionally, we checked reference lists of selected articles and identified eleven papers  
44 that were not displayed in the initial electronic query. We therefore reviewed 42 abstracts and  
45 identified 24 unique studies conducted in low and middle-income countries (LMICs). Fourteen  
46 of them investigated the association of birth size and/or early-life size with schooling or IQ, or  
47 with both outcomes during childhood. Three studies investigated the association between linear  
48 growth in early childhood and schooling and intelligence in adults, one studied the association  
49 between early-life undernutrition and IQ in early adulthood and another six publications  
50 investigated the association between growth and school attainment in adults. Economists have  
51 also studied the relationship between stunting or linear growth and schooling in LMICs, but to  
52 our knowledge not the relative importance of growth during specific age intervals.

53

54 **Added value of this study**

55 This is an analysis of the associations between child and adolescent growth and two dimensions  
56 of human capital (schooling attainment and IQ) in adulthood in six birth cohorts from five  
57 LMICs. The evidence of long-term associations of linear growth with adult IQ is scarce and the  
58 few published studies have analyzed data from a single country. In the present study, we found  
59 that size at birth and linear growth from birth to around 2 years of age were positively associated  
60 with both schooling and IQ in adulthood. Linear growth between early and mid-childhood (MC)  
61 was not associated with higher school attainment or IQ in adjusted models. Linear growth from

62 MC to adulthood was not associated with IQ in men or women, and was inversely associated  
63 with schooling attainment in women only. Change in relative weight in early childhood was  
64 positively associated with schooling attainment only in minimally adjusted models. Relative  
65 weight measures in MC and adulthood were inversely associated with schooling attainment.  
66 Change in relative weight between MC and adulthood was not associated with adult IQ.

67

### 68 **Implications of all the available evidence**

69 We confirmed in multiple cohorts that birth size and linear growth from birth to age 2 years are  
70 predictors of schooling attainment and adult IQ. Linear growth in early life was the strongest  
71 predictor of these two human capital dimensions in adulthood among individuals in LMICs. We  
72 did not find evidence that supports the notion that linear growth in adolescence contributes to a  
73 better cognitive performance in adulthood. Thus, our results inform the more effective timing of  
74 nutritional and other interventions to improve linear growth and human capital in the long-term.

75

## 76 Introduction

77

78 Growth faltering remains widespread in low and middle-income countries (LMIC), with 96.8  
79 million children under five being stunted.<sup>1</sup> The period between conception and the second  
80 birthday is critical for human growth<sup>2</sup> as well as for development of brain structure, architecture  
81 and function.<sup>3</sup> In early childhood, sensory and motor functions develop, followed by acquisition  
82 of basic language skills and spatial attention.<sup>3</sup> Evidence from birth cohort studies indicates that  
83 linear growth in the first 24 months after birth is among the strongest predictors of school  
84 attainment,<sup>4</sup> being positively associated with more years of schooling, lower probability of  
85 failing a grade, younger age of enrollment in school, and better verbal and nonverbal skills.<sup>4-8</sup>  
86 Further, lower schooling attainment is related to future disadvantages such as lower wages<sup>7,9</sup>,  
87 less income,<sup>4</sup> unemployment or informal sector work,<sup>10</sup> and a higher probability of living in  
88 poverty.<sup>7</sup>

89 Prenatal and postnatal growth predict childhood and adolescent cognition. A meta-analysis of 68  
90 studies from LMIC demonstrated associations between linear growth in children younger than 24  
91 months and cognition and motor skills at 5-11 years of age.<sup>11</sup> In the multi-country Young Lives  
92 Study, growth from 1 to 8 years of age was associated with better performance in mathematics,  
93 reading, and vocabulary tests in children aged 8 years.<sup>12</sup> They also found that stunted children or  
94 those who were stunted at age 1 but not at age 8 had lower cognitive scores than their  
95 counterparts who never experienced growth faltering.<sup>12</sup> Other analyses of the Young Lives Study  
96 data also reported that linear growth across childhood or in adolescence was associated with  
97 cognitive outcomes at ages 12 and 15 years, respectively.<sup>13,14</sup> In a cohort of Thai children, linear  
98 growth from birth to 4 months and from 4 months to 12 months were both positively associated  
99 with intelligence quotient (IQ) at 9 years of age.<sup>15</sup> In a cohort study of Chinese children, weight  
100 gain between 6 and 12 months after birth showed positive associations with IQ, comprehension,  
101 memory, and reasoning at aged 7-9 years.<sup>16</sup>

102 Fewer studies have investigated the association between adult IQ and growth across childhood.  
103 Two studies in Brazilian cohorts showed that growth in early childhood had a positive  
104 association with IQ, school attainment and monthly income in adults.<sup>17,18</sup> Given the paucity of  
105 studies on this topic and the fact that LMICs have the highest burden of growth faltering in  
106 childhood, the long-term correlates of child growth especially in LMICs, need further research.

107 Although the importance of growth during the first 1,000 days to acquisition of human capital is  
108 undisputed,<sup>4-8</sup> it has been claimed that there is a second window of opportunity during  
109 adolescence when catch-up in height may occur.<sup>2,14,19</sup> In a World Bank Group book about child  
110 and adolescent health and development that combines economic theory with health sciences,  
111 Alderman et al. agree on the need for a better comprehension of “*individuals' development*  
112 *timing and age-dependent responses*”.<sup>20</sup> Therefore, studies are needed to assess how adult human  
113 capital is associated with growth during different age ranges from birth to adulthood. This  
114 evidence may contribute to better targeted interventions among young children, adolescents, or  
115 both groups.

116 We describe associations between growth across childhood and adolescence and two dimensions  
117 of adult human capital (school attainment and IQ) in six birth cohorts from five LMICs.

118

## 119 **Methods**

120

### 121 **Study design and data sources**

122 We analyzed data from the six birth cohorts that constitute the Consortium of Health-Oriented  
123 Research in Transitioning Societies (COHORTS).<sup>21</sup> The cohorts are from Brazil,<sup>22,23</sup> Guatemala  
124,<sup>24</sup> India,<sup>25</sup> the Philippines,<sup>26</sup> and South Africa.<sup>27</sup> All fieldwork followed procedures approved  
125 by local Ethics Review committees, and the present analyses were approved by the Emory  
126 University Institutional Review Board.

127

### 128 **Child growth**

129 Anthropometrics in childhood were obtained using site-specific protocols as described  
130 elsewhere.<sup>22-27</sup> Birth data were collected in hospitals after delivery (Brazil and South Africa), in  
131 the community within 3 days of birth by the research team (India), at home or in hospitals by  
132 birth attendants (Philippines), and in a healthcare center or at home by a project nurse 15 days  
133 after birth (Guatemala). Birth weight was available in all cohorts, and birth length was available  
134 in all cohorts except Brazil (1982) and South Africa. Calculation of gestational age was based on  
135 the date of last menstrual period reported by the child's mother, and supplemented with Ballard  
136 scores for LBW infants in the Philippines. We identified ages at measurement common across  
137 the birth cohorts. Supine length and weight were measured at age 24 months in all cohorts except

138 Brazil (1993), for which measurements were obtained at 12 months. We refer to this age as at  
139 around 2 years. Standing height and weight were measured at 48 months for all cohorts (supine  
140 length was measured in Guatemala) except for the Philippines, where measures were obtained at  
141 108 months. We refer to this age as mid-childhood (MC). We refer to all postnatal measures of  
142 length and height as height, for convenience. Heights and weights were expressed as height-for-  
143 age (HAZ) and weight-for-age (WAZ) Z-scores using the WHO Growth Standards.<sup>28</sup>  
144 Repeated measures of height and weight are highly correlated. As in previous work,<sup>5</sup> we created  
145 conditional height measures by regressing current height on all previous height and weight  
146 measurements, and conditional weight measures by regressing current weight on current height  
147 and all prior height and weight measures, within strata of site and sex. Conditional size variables  
148 are standardized (mean=0 and standard deviation=1) residuals of such regressions, and denote  
149 how much a child deviates from his/her expected height or weight based on his/her earlier  
150 growth, considering the growth trajectories of the other children of the same sex and cohort.  
151 We generated three conditional height variables: conditional height at 2 years, and conditional  
152 height in MC and in adulthood. These variables correspond to linear growth from birth to 2  
153 years, from 2 years to MC, and from MC to adulthood, respectively. Regarding weight, three  
154 conditional variables were also generated: conditional weight at 2 years, in MC and in adulthood.  
155 These variables correspond to relative weight from birth to 2 years, from 2 years to MC, and  
156 from MC to adulthood, respectively.  
157 As birth length was not available for two cohorts, we generated conditional measures using birth  
158 weight as the anchor. Additionally, results using birth length as the anchor (for the four cohorts  
159 for which this measure was available) are provided in the Supplementary tables. Previous  
160 analyses have shown that models starting with birthweight or birth length produce similar  
161 associations with later outcomes.<sup>5</sup>

162

### 163 **Adult outcomes**

164 We obtained the highest grade of attained formal schooling by interview. We modeled attained  
165 schooling as an integer variable. For India, the data are only available in categorized form, and  
166 we assigned numeric values based on the years typically required to attain each category. We  
167 also categorized the number of years of schooling attainment as a binary variable, using site-  
168 specific thresholds relevant to schooling completion current at the time the cohort members were



169 children (Brazil 1982:  $\geq 12$  years; Brazil 1993:  $\geq 11$  years; Guatemala:  $\geq 6$  years; India:  $\geq 13.5$   
170 years; The Philippines:  $\geq 11$  years; South Africa:  $\geq 12$  years).

171 To measure IQ in adulthood, we administered the Raven's Standard Progressive Matrices<sup>29</sup> to  
172 participants in the Guatemala, Philippines and South Africa cohorts. In Guatemala, sections A  
173 through C were administered due to inability to proceed beyond this point, for a maximum score  
174 of 36 points. In the Philippines and South Africa, sections A through E were administered, for a  
175 maximum score of 60 points. In both Brazilian cohorts, the arithmetic, digit symbol, similarities,  
176 and picture completion subtests of the Wechsler Adult Intelligence Scale (3rd version) were  
177 administered.<sup>30</sup> Adult IQ was not available for the India cohort. We standardized the distribution  
178 within each cohort and by sex to a mean of 100 and a standard deviation of 15 to remove  
179 between-cohort differences that may relate to language of administration, context, or tests  
180 administered

181

## 182 **Covariates**

183 Maternal height (cm), age at birth of the cohort participant (years), schooling (years), paternal  
184 schooling (years), child birth order, household socioeconomic status (quintiles of the site-specific  
185 distribution), and for Guatemala birth year and intervention group (Atole, Fresco), in the original  
186 nutrition supplementation trial near the time of the cohort participant's birth were extracted from  
187 data archives.

188

## 189 **Statistical analysis**

190 We used R version 3.6.2 for analyses. We restricted all analyses to participants with complete  
191 information for anthropometric variables at birth and in childhood, and IQ (except India) and  
192 schooling variables in adulthood. For descriptive analyses, we calculated means and standard  
193 deviations for continuous variables, and proportions for categorical variables.

194 In cohort-specific analyses, we used linear regression for continuous outcomes (number of years  
195 of attained schooling and IQ scores) and quasi-Poisson regression for the binary outcome of  
196 school attainment to estimate the associations with conditional size measures. We used inverse  
197 sampling weights in all analyses of the 1993 Brazil cohort, because data were collected for all  
198 low birthweight infants and a random 20% sample of other infants.

199 All cohort-specific analyses were performed for males and females separately. We stratified the  
200 analyses by study site and sex given observed heterogeneity among sites and previous literature  
201 that supports sex differences in IQ scores.<sup>31</sup> Sex-combined estimates were generated by pooling  
202 the sex-specific estimates using weighted random effects meta-analysis, with the weight each sex  
203 received being proportional to sample size.

204 A doubly-robust strategy was used for covariate adjustment, where adjustment was performed  
205 via multivariable regression after inverse probability of treatment weighting (IPTW) using the  
206 “ipwpoint” function from the “ipw” package in R,<sup>32</sup> applying linear regression to model the  
207 relationship between the exposure variable and the covariates. This regression was specified to  
208 include a “main effect” term for all covariates, as well as all pairwise product terms between  
209 covariates. To mitigate the possibility that individuals with large weights could substantially  
210 influence the results, the left tail of the weights was truncated at the 0.5th percentile, and the  
211 right tail at the 99.5th percentile.

212 We defined four models a priori with progressive adjustment of potential confounders. We used  
213 listwise deletion in all models. In model one (minimal adjustment), we adjusted for sex (for  
214 analyses involving both sexes), and year of birth and intervention group in Guatemala. In model  
215 two, we controlled for the same variables as in model one but excluded cases that could not be  
216 included in subsequent models because of missing values. We found similar point estimates  
217 between models one and two, suggesting that missing covariate data was not a major factor in  
218 our results. In model three, we adjusted for the covariates in model one, plus early-life  
219 socioeconomic quintiles, maternal schooling, maternal age, maternal height, birth order and, for  
220 the Brazil 1982 and 1993 cohorts, skin color. Comparing models two and three allowed us to  
221 assess changes due to confounding by the selected covariates. In model four (further adjustment),  
222 we controlled for covariates in model three plus paternal schooling. Model four is our preferred  
223 representation.

224 We used random effects meta-analysis to pool the sex- and cohort-specific results. Pooled sex-  
225 combined estimates were generated by pooling the corresponding pooled sex-specific estimates.  
226 The variation between cohorts was estimated using  $I^2$  statistic and Cochran’s Q test, and random  
227 effects meta-regression was used to test for the effect modification by sex.

228

229 **Role of the funding source**

230

231 The funders of this study did not have any role in study design, collection and analysis of data,  
232 description and interpretation of results, and writing of this manuscript. The corresponding  
233 author had full access to all the data in the study and had final responsibility for the decision to  
234 submit for publication.

235

## 236 **Results**

237

238 Data from 9503 participants with complete data for at least one of the outcomes and size at 2  
239 years of age were analyzed. Table 1 shows selected characteristics of the participants. Birth  
240 weight z-scores were lowest among individuals born in India. The Guatemalan, Filipino and  
241 Indian participants had the lowest height-for-age and weight-for-age z-scores in early and mid-  
242 childhood and were shortest as adults. Schooling for both parents was lowest in Guatemala.  
243 School attainment was higher in women across all cohorts when compared to men, except in  
244 Guatemala.

245

### 246 *Growth and school attainment*

247 The site- and sex-pooled associations between growth and school attainment are presented in  
248 Table 2 and Supplementary Table 2. Measures of weight or length at birth, and height at around  
249 2 years and in MC were each positively associated ( $p < 0.01$ ) with schooling attainment. Covariate  
250 adjustment attenuated the estimates and linear growth in MC was no longer significant. The  
251 point estimates were larger for conditional height at 2 years of age (0.25, 95%CI: 0.10, 0.40)  
252 compared to birth weight (0.13, 95%CI: 0.08, 0.19) or birth length (0.20, 95%CI: 0.11, 0.30).  
253 Conditional height in adulthood was not associated with schooling attainment in men ( $p = 0.48$ )  
254 but it was inversely associated in women ( $p = 0.013$ ). Conditional relative weight at around 2  
255 years was not associated with schooling attainment in fully adjusted models. Conditional relative  
256 weight in MC and in adulthood was inversely associated with schooling attainment. The results  
257 were generally consistent between males and females and across the six cohorts, although there  
258 was heterogeneity in the size of the estimates (Table 3). Sex differences were observed in the  
259 estimates for conditional height in adulthood, and for the estimates for conditional relative  
260 weight in MC and in adulthood. In models that examined the binary categorization of schooling

261 attainment, we found similar associations in both pooled and site-stratified analyses  
262 (Supplementary Tables 3 and 5).

263  
264 *Growth and IQ*

265 The site- and sex-pooled associations between growth and IQ are presented in Table 2 and  
266 Supplementary Table 2. Measures of weight or length at birth, and height at around 2 years and  
267 in MC were each positively associated ( $p < 0.001$ ) with adult IQ. After covariate adjustment the  
268 strength of associations was reduced and the estimate for conditional height in MC was not  
269 significant. The point estimates were larger for conditional height at 2 years of age (1.52, 95%CI:  
270 0.96, 2.08) compared to birth weight (0.74, 95%CI: 0.35, 1.14) or birth length (0.73, 95%CI:  
271 0.35, 1.10). Conditional height in adulthood was not associated with IQ. Measures of relative  
272 weight at around 2 years, in MC and in adulthood were not associated with adult IQ. In general,  
273 the results were consistent between males and females although there was heterogeneity across  
274 the five cohorts in the size and significance of the estimates (Table 4).

275  
276 **Discussion**

277  
278 This analysis of data from six birth cohorts from LMICs showed that birth size and linear growth  
279 from birth to age 2 years were positively associated with schooling attainment and adult IQ.  
280 Linear growth from age 2 years to MC was not associated with either of the outcomes in fully  
281 adjusted models. We observed that the effect sizes were larger for conditional height at 2 years  
282 of age when compared to length at birth. Apart from an inverse association between conditional  
283 height in adulthood and schooling attainment in female participants, conditional height in  
284 adulthood was not associated with either schooling attainment or IQ. Conditional relative weight  
285 in MC and in adulthood were each inversely associated with schooling attainment. Change in  
286 relative weight was not associated with adult IQ for any of the age intervals examined.

287 These results suggest that birth size and linear growth from birth to around 2 years are  
288 independent predictors of schooling and intelligence in adulthood. This is important because  
289 improvements in human capital dimensions are associated with economic growth. This  
290 independent association, at least in childhood, had previously been observed.<sup>12,13,33,34</sup> We found  
291 that for every 1 Z-score increase in conditional linear growth at age 2 years there was an increase

292 in 0.25 years of schooling and 1.52 units of adult IQ score after adjustment (Table 2). It has been  
293 estimated that for every additional year of schooling there is a 7.9% country level economic  
294 return;<sup>9</sup> and one standard deviation increase in cognitive skills of a country's workforce has been  
295 associated with an increase of two percentage points in the per capita GDP (annual growth) and  
296 economic returns that range from 0.07 to 0.48, in developing countries.<sup>35,36</sup>

297 Our findings further confirm that timing (and specifically the first 1,000 days) is critical to  
298 improve schooling outcomes and intellectual performance in adulthood. Human growth is not  
299 uniform and systems, organs, and tissues develop at different velocities. Linear growth is  
300 characterized by high initial velocity with rapid deceleration in the first two years after birth.<sup>37</sup>  
301 The brain achieves 83% of its adult volume by 24 months of postnatal life.<sup>38</sup> Thus, shared  
302 underlying determinants of both length and neurodevelopment might influence adult human  
303 capital defined as a group of capacities, abilities, and intangible assets useful to create economic  
304 value.<sup>39</sup> Interventions in early life have the highest overall returns compared to other life course  
305 stages, and interventions to reduce stunting in the first 24 months of age not only increased  
306 preschool linear growth but had benefit-cost ratios greater than one, demonstrating that such  
307 interventions are a good economic investment.<sup>20</sup> In that sense, that benefit in linear growth also  
308 indirectly benefit schooling attainment and cognitive performance in the long term.

309 We infer that the multiple causes of linear growth failure partly impact on brain development and  
310 learning; hence, linear growth failure predicts schooling and IQ. The relationship is not causal  
311 and there are at least four pathways that explain the results observed. First, linear growth and  
312 brain development are susceptible to common nutritional inputs,<sup>40</sup> many of which have  
313 underlying determinants such as socioeconomic status (poverty), maternal education, food  
314 insecurity, water scarcity, poor sanitation and hygiene, among others.<sup>41</sup> Thus, nutritional deficits  
315 in sensitive periods of life affect not only body growth but brain size, structure, development and  
316 function.<sup>42</sup> Second, growth faltering makes children more susceptible to infections that in turn  
317 decrease appetite, absorption, and nutrients' use; nutrients will be diverted to the immune system  
318 affecting its availability for growth and development.<sup>43</sup> Third, undernourished and ill children are  
319 commonly apathetic, irritable, and less interested in exploring their environment.<sup>43</sup> Fourth, the  
320 size of children may elicit different interactions with adults given that short children appear

321 younger and are treated as such.<sup>44</sup> Thus, short children lag in acquiring motor, cognitive and  
322 social behaviors.<sup>44</sup>

323 Our results confirm earlier research that prenatal growth and linear growth in early childhood are  
324 significantly associated with higher school attainment<sup>4-7,17,18</sup> and adult IQ.<sup>7,17,18</sup> Analyses of  
325 Young Lives Study data found that linear growth in different age intervals (1, 5, 8, 12, and 15)  
326 was positively associated with cognitive skills in mid-childhood, early adolescence and  
327 adolescence.<sup>12-14,33</sup> Two studies suggested that these associations were mediated through HAZ at  
328 subsequent age intervals.<sup>13,33</sup> We observed similar tendencies in the direction of the associations,  
329 however, the magnitudes of our estimates were stronger than those reported in the Young Lives  
330 Study.<sup>12,14,33</sup>

331 We did not find statistical associations between conditional relative weight in early childhood  
332 and school attainment after full adjustment. Adair et al<sup>5</sup> had previously observed a significant but  
333 weak association between conditional relative weight in early childhood and the highest grade  
334 attained. The differences in our study might be attributed to the inclusion of a new birth cohort  
335 (Brazil 1993), variations in sample sizes, and a higher number of covariates. Conditional relative  
336 weight in early and in MC were not associated with IQ, as previously shown in studies  
337 conducted with adults<sup>17,18</sup> and children.<sup>15</sup>

338 Our findings agreed with previous studies that linear growth from 2 years to MC and from MC to  
339 adulthood were not associated with schooling attainment and adult IQ.<sup>5,17,18</sup> Indeed, we found  
340 that conditional height and change in relative weight from MC to adulthood were inversely  
341 associated with schooling attainment in female participants. Our results do not support the notion  
342 that interventions in adolescence aimed at improving linear growth are likely to impact adult IQ,  
343 as has been suggested by other authors.<sup>14</sup> The period from MC to adulthood includes late  
344 childhood, adolescence and adulthood through ages 18 to 46 years. Linear growth and  
345 neurodevelopment are largely complete by adulthood and individuals have already finished  
346 school. Thus, it is unlikely that weight changes in adulthood are predictors of schooling  
347 attainment. Rather, the inverse associations may reflect reverse causality. In adulthood, women`s  
348 weight and weight changes are influenced by multiple biological and environmental factors such  
349 as genetics (body composition), reproductive events (parity), marital status, life-style behaviors,

350 work settings, food environment, socioeconomic status, many of which might be determined  
351 schooling attainment earlier in life.

352 Among the study's limitations, we note some inconsistencies in the ages of exposures and  
353 outcomes across the cohorts. Height was measured at 2 years of age in all sites except Brazil  
354 1993 cohort, where it was measured at 1 year of age. Similarly, MC was considered to be 4 years  
355 in most of the cohorts, but 8.5 years in the Philippines. There were also differences in the ages in  
356 which the schooling and IQ outcomes were obtained, and some differences in the instruments  
357 used to measure IQ across sites. Finally, residual and unmeasured confounding should be  
358 considered given the observational nature of our study.

359 This study has several strengths. We analyzed six well-characterized population-based birth  
360 cohorts in five LMIC with follow-up periods that ranged from 18 to 46 years. Each study site had  
361 trained staff who followed standard methodologies to collect the anthropometric and  
362 sociodemographic data, which minimized measurement error and recall bias. The treatment of  
363 our exposures as conditional measures of growth avoids collinearity and facilitates  
364 differentiation of linear growth at specific age intervals. Each site used validated measures of  
365 intelligence, and we standardized the distributions within each cohort and by sex to be able to  
366 compare outcomes. We adjusted our models for a range of early life social factors. Additionally,  
367 our analytic sample with complete data was not affected by missing values and loss at follow-up,  
368 as evidenced by the similar results obtained when comparing models one and two  
369 (Supplementary Table 1). We saw evidence of heterogeneity among the cohorts in the magnitude  
370 of the estimates but not in the direction of the associations. Thus, we were able to obtain single  
371 pooled estimates combining cohort-specific results. These associations might be generalized to  
372 other LMICs, but should be interpreted with caution given the differences between pooled and  
373 site-specific results, acknowledging that our findings might not represent the entire diversity and  
374 complexity of the studied countries.

375 In conclusion, our results show an independent association between prenatal growth and linear  
376 growth from birth until the second year of life with adult human capital. These findings confirm  
377 the importance of the first 1,000 days, a sensitive period where adversities including poor  
378 nutrition will have long-lasting effects on adult size and functional capacities such as learning  
379 and intelligence. Our findings do not show that improvements in linear growth after the first two



380 years, during childhood, adolescence or adulthood, were associated with adult human capital  
381 outcomes.

382

### 383 **Contributors**

384 ADS and CGV conceived the idea and study design. NEP performed the literature review and  
385 wrote the first draft of the manuscript. NEP, ADS, CGV and FPH led the writing team. FPH  
386 performed the statistical analyses. CGV, LSA, FCB, SKB, BLH, NRL, RM, MM, AMBM, SAN,  
387 LMR, HSS, AS, FCW, and ADS participated in data collection. All authors read and commented  
388 on successive drafts, and approved the final manuscript.

389

### 390 **Declaration of interests**

391 All authors declare no conflicts of interest.

392

### 393 **Acknowledgments**

394 We acknowledge funding from the Bill and Melinda Gates Foundation (OPP1164115) for data  
395 collection in Guatemala, Philippines and South Africa and for data management and analysis.  
396 Data collection in Brazil was funded by the Wellcome Trust. The New Delhi Birth Cohort has  
397 received funding from the Indian Council of Medical Research, the Department of  
398 Biotechnology, the United States National Center for Health Statistics, the Medical Research  
399 Council (UK), the British Heart Foundation, and the Bill and Melinda Gates Foundation. The  
400 Birth to Twenty Plus Cohort is supported by the South African Medical Research Council, DSI-  
401 NRF Centre of Excellence in Human Development at the University of the Witwatersrand,  
402 Johannesburg, South Africa, and the Wellcome Trust (UK).

403

### 404 **References**

405

- 406 1. Group U-W-TWB. Joint child malnutrition estimates - Levels and trends (2019 edition):  
407 World Health Organization, 2019.
- 408 2. Bundy DAP, Horton S. Impact of Interventions on Health and Development during  
409 Childhood and Adolescence: A Conceptual Framework. In: Bundy DAP, Silva ND, Horton S,  
410 Jamison DT, Patton GC, eds. Child and Adolescent Health and Development. Washington (DC):  
411 The International Bank for Reconstruction and Development / The World Bank; 2017.



- 412 3. Thompson RA, Nelson CA. Developmental Science and the Media. *Early Brain*  
413 *Development. The American psychologist* 2001; **56**(1).
- 414 4. Victora CG, Adair L, Fall C, et al. Maternal and child undernutrition: consequences for  
415 adult health and human capital. *Lancet* 2008; **371**(9609): 340-57.
- 416 5. Adair LS, Fall CH, Osmond C, et al. Associations of Linear Growth and Relative Weight  
417 Gain During Early Life With Adult Health and Human Capital in Countries of Low and Middle  
418 Income: Findings From Five Birth Cohort Studies. *Lancet (London, England)* 2013; **382**(9891).
- 419 6. Martorell R, Horta BL, Adair LS, et al. Weight Gain in the First Two Years of Life Is an  
420 Important Predictor of Schooling Outcomes in Pooled Analyses From Five Birth Cohorts From  
421 Low- And Middle-Income Countries. *The Journal of nutrition* 2010; **140**(2).
- 422 7. Hoddinott J, Behrman JR, Maluccio JA, et al. Adult consequences of growth failure in  
423 early childhood. *The American journal of clinical nutrition* 2013; **98**(5): 1170-8.
- 424 8. Daniels MC, Adair LS. Growth in young Filipino children predicts schooling trajectories  
425 through high school. *The Journal of nutrition* 2004; **134**(6): 1439-46.
- 426 9. Fink G, Peet E, Danaei G, et al. Schooling and wage income losses due to early-  
427 childhood growth faltering in developing countries: national, regional, and global estimates. *The*  
428 *American journal of clinical nutrition* 2016; **104**(1): 104-12.
- 429 10. Carba DB, Tan VL, Adair LS. Early childhood length-for-age is associated with the work  
430 status of Filipino young adults. *Econ Hum Biol* 2009; **7**(1): 7-17.
- 431 11. Sudfeld CR, McCoy DC, Danaei G, et al. Linear growth and child development in low-  
432 and middle-income countries: a meta-analysis. *Pediatrics* 2015; **135**(5): e1266-75.
- 433 12. Crookston BT, Schott W, Cueto S, et al. Postinfancy Growth, Schooling, and Cognitive  
434 Achievement: Young Lives. *The American journal of clinical nutrition* 2013; **98**(6).
- 435 13. Kowalski AJ, Georgiadis A, Behrman JR, Crookston BT, Fernald LCH, Stein AD. Linear  
436 Growth Through 12 Years Is Weakly but Consistently Associated With Language and Math  
437 Achievement Scores at Age 12 Years in 4 Low- Or Middle-Income Countries. *The Journal of*  
438 *nutrition* 2018; **148**(11).
- 439 14. Fink G, Rockers PC. Childhood growth, schooling, and cognitive development: further  
440 evidence from the Young Lives study. *The American journal of clinical nutrition* 2014; **100**(1):  
441 182-8.
- 442 15. Pongcharoen T, Ramakrishnan U, DiGirolamo AM, et al. Influence of prenatal and  
443 postnatal growth on intellectual functioning in school-aged children. *Arch Pediatr Adolesc Med*  
444 2012; **166**(5): 411-6.
- 445 16. Li C, Zeng L, Wang D, et al. Growth in early life and physical and intellectual  
446 development at school age: a cohort study. *Br J Nutr* 2019; **121**(8): 866-76.
- 447 17. Horta BL, Victora CG, de Mola CL, et al. Associations of Linear Growth and Relative  
448 Weight Gain in Early Life With Human Capital at 30 Years of Age. *The Journal of pediatrics*  
449 2017; **182**.
- 450 18. Menezes AMB, Oliveira PD, Wehrmeister FC, et al. Associations between growth from  
451 birth to 18 years, intelligence, and schooling in a Brazilian cohort. *The American journal of*  
452 *clinical nutrition* 2020.
- 453 19. Prentice AM, Ward KA, Goldberg GR, et al. Critical windows for nutritional  
454 interventions against stunting. *The American journal of clinical nutrition* 2013; **97**(5): 911-8.
- 455 20. Alderman H, Behrman JR, Glewwe P, Fernald L, Walker S. Evidence of Impact of  
456 Interventions on Growth and Development during Early and Middle Childhood. In: Bundy DAP,  
457 Silva ND, Horton S, Jamison DT, Patton GC, eds. *Child and Adolescent Health and*

- 458 Development. Washington (DC): The International Bank for Reconstruction and Development /  
459 The World Bank; 2017.
- 460 21. Richter LM, Victora CG, Hallal PC, et al. Cohort profile: the consortium of health-  
461 orientated research in transitioning societies. *Int J Epidemiol* 2012; **41**(3): 621-6.
- 462 22. Victora CG, Barros FC. Cohort profile: the 1982 Pelotas (Brazil) birth cohort study. *Int J*  
463 *Epidemiol* 2006; **35**(2): 237-42.
- 464 23. Victora CG, Hallal PC, Araújo CL, Menezes AM, Wells JC, Barros FC. Cohort Profile:  
465 The 1993 Pelotas (Brazil) Birth Cohort Study. *International journal of epidemiology* 2008;  
466 **37**(4).
- 467 24. Stein AD, Melgar P, Hoddinott J, Martorell R. Cohort Profile: the Institute of Nutrition of  
468 Central America and Panama (INCAP) Nutrition Trial Cohort Study. *Int J Epidemiol* 2008;  
469 **37**(4): 716-20.
- 470 25. Bhargava SK, Sachdev HS, Fall CH, et al. Relation of serial changes in childhood body-  
471 mass index to impaired glucose tolerance in young adulthood. *N Engl J Med* 2004; **350**(9): 865-  
472 75.
- 473 26. Adair LS, Popkin BM, Akin JS, et al. Cohort profile: the Cebu longitudinal health and  
474 nutrition survey. *Int J Epidemiol* 2011; **40**(3): 619-25.
- 475 27. Richter L, Norris S, Pettifor J, Yach D, Cameron N. Cohort Profile: Mandela's children:  
476 the 1990 Birth to Twenty study in South Africa. *Int J Epidemiol* 2007; **36**(3): 504-11.
- 477 28. WHO. The WHO Child Growth Standards. 2016-06-08 09:11:46 2016.  
478 <https://www.who.int/childgrowth/en/>.
- 479 29. Raven J. The Raven's progressive matrices: change and stability over culture and time.  
480 *Cogn Psychol* 2000; **41**(1): 1-48.
- 481 30. Banhato EFC, Leite ICG, Guedes DV, Chaoubah A. Criterion Validity of a Wechsler-III  
482 Scale Short Form in a Sample of Brazilian Elderly. *Dementia & neuropsychologia* 2010; **4**(3).
- 483 31. Nisbett RE, Aronson J, Blair C, et al. Intelligence: new findings and theoretical  
484 developments. *Am Psychol* 2012; **67**(2): 130-59.
- 485 32. van der Wal WM, Geskus RB. ipw: An R Package for Inverse Probability Weighting.  
486 *Journal of Statistical Software* 2011; **43**: 1-23.
- 487 33. Georgiadis A, Benny L, Crookston BT, et al. Growth trajectories from conception  
488 through middle childhood and cognitive achievement at age 8 years: Evidence from four low-  
489 and middle-income countries. *SSM Popul Health* 2016; **2**: 43-54.
- 490 34. Silva A, Metha Z, O'Callaghan F J. The relative effect of size at birth, postnatal growth  
491 and social factors on cognitive function in late childhood. *Ann Epidemiol* 2006; **16**(6): 469-76.
- 492 35. Hanushek EA. Economic growth in developing countries: The role of human capital.  
493 *Economics of Education Review* 2013; **37**: 204-12.
- 494 36. Hanushek EA, Woessmann L. The Role of Cognitive Skills in Economic Development.  
495 *Journal of Economic Literature* 2008; **46**(3): 607-68.
- 496 37. Cameron N, Bogin B. Human Growth and Development. Second ed. London, UK:  
497 Elsevier; 2012.
- 498 38. Knickmeyer RC, Gouttard S, Kang C, et al. A structural MRI study of human brain  
499 development from birth to 2 years. *J Neurosci* 2008; **28**(47): 12176-82.
- 500 39. Martorell R. Improved nutrition in the first 1000 days and adult human capital and health.  
501 *Am J Hum Biol* 2017; **29**(2).

- 502 40. Prado EL, Larson LM, Cox K, Bettencourt K, Kubes JN, Shankar AH. Do effects of early  
503 life interventions on linear growth correspond to effects on neurobehavioural development? A  
504 systematic review and meta-analysis. *Lancet Glob Health* 2019; **7**(10): e1398-e413.
- 505 41. Alderman H, Fernald L. The Nexus Between Nutrition and Early Childhood  
506 Development. *Annual review of nutrition* 2017; **37**: 447-76.
- 507 42. Prado EL, Dewey KG. Nutrition and brain development in early life. *Nutr Rev* 2014;  
508 **72**(4): 267-84.
- 509 43. de Onis M, Branca F. Childhood stunting: a global perspective. *Matern Child Nutr* 2016;  
510 **12 Suppl 1**(Suppl 1): 12-26.
- 511 44. Pollitt E, Golub M, Gorman K, et al. A Reconceptualization of the Effects of  
512 Undernutrition on Children's Biological, Psychosocial, and Behavioral Development *Social*  
513 *Policy Report* 1996; **X**(5): 32.
- 514
- 515

## Tables

**Table 1. Characteristics of participants in the six cohorts stratified by sex**

|                             | Brazil<br>1982  |                   | Brazil<br>1993 |                  | Guatemala<br>1969-77 |                  | India<br>1969-72 |                  | Philippines<br>1983-84 |                  | South Africa<br>1990 |                  |
|-----------------------------|-----------------|-------------------|----------------|------------------|----------------------|------------------|------------------|------------------|------------------------|------------------|----------------------|------------------|
|                             | Men<br>(n=1606) | Women<br>(n=1657) | Men<br>(n=564) | Women<br>(n=629) | Men<br>(n=332)       | Women<br>(n=394) | Men<br>(n=840)   | Women<br>(n=614) | Men<br>(n=901)         | Women<br>(n=813) | Men<br>(n=548)       | Women<br>(n=605) |
| <b>Birth variables</b>      |                 |                   |                |                  |                      |                  |                  |                  |                        |                  |                      |                  |
| Gestational age (weeks)     | 39.4 (1.7)      | 39.4 (1.8)        | 39.2 (2.6)     | 39.1 (2.8)       | 39.1 (2.8)           | 39.6 (3.1)       | 38.7 (2.6)       | 39.1 (2.4)       | 38.7 (2.2)             | 38.8 (2.1)       | 38.1 (1.8)           | 38.0 (1.9)       |
| Birth length (WHO Z-scores) | NA              | NA                | -0.8 (1.6)     | -1.0 (1.5)       | 0.0 (1.3)            | 0.0 (1.1)        | -0.7 (1.1)       | -0.6 (1.1)       | -0.3 (1.1)             | -0.2 (1.1)       | NA                   | NA               |
| Birth weight (WHO Z-scores) | -0.2 (1.1)      | -0.2 (1.2)        | -0.7 (1.5)     | -0.9 (1.5)       | -0.7 (1.1)           | -0.6 (1.0)       | -1.1 (1.0)       | -1.1 (0.9)       | -0.7 (1.0)             | -0.6 (1.0)       | -0.6 (1.1)           | -0.6 (1.2)       |
| <b>Childhood variables</b>  |                 |                   |                |                  |                      |                  |                  |                  |                        |                  |                      |                  |
| HAZ at around 2 years (SD)  | -0.7 (1.2)      | -0.6 (1.2)        | -0.3 (1.3)     | -0.2 (1.2)       | -3.0 (1.1)           | -2.9 (1.1)       | -2.0 (1.2)       | -1.9 (1.1)       | -2.4 (1.1)             | -2.4 (1.1)       | -1.4 (1.1)           | -1.1 (1.0)       |
| HAZ in mid-childhood (SD)   | -0.6 (1.1)      | -0.6 (1.1)        | -0.2 (1.1)     | -0.2 (1.1)       | -2.4 (0.9)           | -2.5 (1.0)       | -1.9 (1.0)       | -2.0 (1.0)       | -2.1 (0.9)             | -2.0 (0.9)       | -1.0 (0.9)           | -0.9 (0.9)       |
| WAZ at around 2 years (SD)  | 0.1 (1.1)       | 0.1 (1.0)         | 0.4 (1.2)      | 0.4 (1.0)        | -1.8 (1.0)           | -1.7 (1.0)       | -1.5 (1.1)       | -1.4 (1.1)       | -1.7 (1.0)             | -1.7 (1.0)       | -0.7 (1.1)           | -0.3 (1.0)       |
| WAZ in mid-childhood (SD)   | 0.1 (1.0)       | 0.0 (1.0)         | 0.3 (1.2)      | 0.2 (1.1)        | -1.4 (0.8)           | -1.5 (0.9)       | -1.3 (0.9)       | -1.5 (0.9)       | -2.0 (1.0)             | -1.9 (0.9)       | -0.5 (0.9)           | -0.5 (0.9)       |
| <b>Adult variables</b>      |                 |                   |                |                  |                      |                  |                  |                  |                        |                  |                      |                  |
| Age (years)                 | 30.2 (0.3)      | 30.2 (0.3)        | 22.6 (0.3)     | 18.4 (0.3)       | 46.5 (2.6)           | 46.2 (2.6)       | 36.1 (1.1)       | 36.1 (1.0)       | 34.4 (0.5)             | 34.5 (0.5)       | 28.5 (0.4)           | 28.5 (0.4)       |
| Height (cm)                 | 173.8 (6.9)     | 161.1 (6.2)       | 174.1 (7.7)    | 160.2 (6.8)      | 163.7 (5.8)          | 151.1 (5.7)      | 169.6 (6.4)      | 154.9 (5.6)      | 162.9 (5.9)            | 151.1 (5.4)      | 171.5 (6.4)          | 159.5 (6.2)      |
| BMI (kg/m <sup>2</sup> )    | 27.2 (5.1)      | 26.8 (6.0)        | 24.6 (4.7)     | 25.4 (5.8)       | 26.7 (4.3)           | 29.4 (5.1)       | 26.9 (4.6)       | 27.5 (5.2)       | 24.8 (4.4)             | 25.2 (5.0)       | 21.6 (3.9)           | 25.8 (6.1)       |
| <b>Covariates</b>           |                 |                   |                |                  |                      |                  |                  |                  |                        |                  |                      |                  |

516  
517  
518  
519

|                                        | Brazil<br>1982  |                   | Brazil<br>1993 |                  | Guatemala<br>1969-77 |                  | India<br>1969-72 |                  | Philippines<br>1983-84 |                  | South Africa<br>1990 |                  |
|----------------------------------------|-----------------|-------------------|----------------|------------------|----------------------|------------------|------------------|------------------|------------------------|------------------|----------------------|------------------|
|                                        | Men<br>(n=1606) | Women<br>(n=1657) | Men<br>(n=564) | Women<br>(n=629) | Men<br>(n=332)       | Women<br>(n=394) | Men<br>(n=840)   | Women<br>(n=614) | Men<br>(n=901)         | Women<br>(n=813) | Men<br>(n=548)       | Women<br>(n=605) |
| Maternal age at childbirth (years)     | 26.1 (6.2)      | 26.2 (6.4)        | 26.3 (6.6)     | 26.3 (6.2)       | 27.1 (7.2)           | 27.3 (7.1)       | 26.9 (6.0)       | 26.9 (5.6)       | 26.4 (6.1)             | 26.4 (6.0)       | 25.6 (6.3)           | 25.7 (6.3)       |
| Maternal height (cm)                   | 156.6 (6.3)     | 156.5 (5.8)       | 159.7 (6.6)    | 159.7 (6.7)      | 148.1 (4.8)          | 148.3 (5.1)      | 151.8 (5.6)      | 152.0 (5.1)      | 150.5 (4.9)            | 150.5 (5.0)      | 158.2 (5.8)          | 158.7 (5.8)      |
| Maternal schooling (years)             | 6.5 (4.0)       | 6.7 (4.2)         | 6.7 (3.5)      | 6.5 (3.4)        | 1.3 (1.5)            | 1.3 (1.5)        | 5.5 (4.5)        | 5.7 (4.5)        | 7.0 (3.3)              | 6.8 (3.1)        | 9.7 (2.4)            | 9.6 (2.6)        |
| Paternal schooling (years)             | 6.7 (4.1)       | 6.9 (4.2)         | 6.6 (3.5)      | 6.9 (4.2)        | 1.8 (2.2)            | 1.8 (2.1)        | 10.4 (5.1)       | 11.2 (4.7)       | 7.2 (3.5)              | 6.9 (3.3)        | 10.6 (2.4)           | 10.5 (2.5)       |
| Birth order                            |                 |                   |                |                  |                      |                  |                  |                  |                        |                  |                      |                  |
| 1                                      | 40.6%           | 38.9%             | 35.6%          | 33.1%            | 18.5%                | 14.0%            | 16.4%            | 14.0%            | 21.8%                  | 21.8%            | 37.4%                | 38.7%            |
| 2                                      | 28.7%           | 29.0%             | 24.5%          | 28.5%            | 12.7%                | 14.7%            | 23.1%            | 20.9%            | 21.6%                  | 23.0%            | 29.2%                | 28.4%            |
| 3                                      | 16.0%           | 16.0%             | 19.1%          | 22.1%            | 12.1%                | 15.0%            | 20.7%            | 21.4%            | 19.6%                  | 18.9%            | 17.0%                | 17.4%            |
| ≥4                                     | 14.7%           | 16.1%             | 20.7%          | 16.4%            | 56.7%                | 56.3%            | 39.8%            | 43.8%            | 37.0%                  | 36.3%            | 16.4%                | 15.5%            |
| <b>Human capital variables</b>         |                 |                   |                |                  |                      |                  |                  |                  |                        |                  |                      |                  |
| IQ score (standardized)                | 100.8 (15.2)    | 99.7 (14.7)       | 99.1 (15.9)    | 99.6 (14.1)      | 105.8 (15.6)         | 97.8 (13.4)      | NA               | NA               | 100.3 (14.8)           | 99.6 (15.2)      | 100.6 (14.4)         | 99.4 (14.8)      |
| School attainment (years of schooling) | 10.9 (4.0)      | 11.9 (4.2)        | 9.2 (2.7)      | 10.0 (2.3)       | 5.6 (3.7)            | 4.7 (3.7)        | 13.2 (3.4)       | 13.9 (3.1)       | 10.2 (3.4)             | 11.2 (2.9)       | 11.5 (1.6)           | 11.9 (1.4)       |

520 Data are presented as mean (SD) or percentage. NA=not available data. HAZ= height-for-age Z-score. WAZ=weight-for-age Z-score. IQ=intelligence quotient.  
 521 Sample sizes refer to participants with non-missing data for at least one outcome and non-missing data for either HAZ or WAZ at 2 years of age. Adult age was  
 522 estimated based on date of IQ measurement, except India (age at latest wave of data collection).  
 523

524  
525

**Table 2. Pooled adjusted associations between growth in childhood and school attainment and IQ in adulthood, by sex**

|                                               | Sex                | Models             | Birth weight  | Conditional height at around 2 years of age | Conditional height in mid-childhood | Conditional height in adulthood | Conditional relative weight at around 2 years of age | Conditional relative weight in mid-childhood | Conditional relative weight in adulthood |
|-----------------------------------------------|--------------------|--------------------|---------------|---------------------------------------------|-------------------------------------|---------------------------------|------------------------------------------------------|----------------------------------------------|------------------------------------------|
| <b>School attainment (years of schooling)</b> | Both sexes         | Minimally adjusted | 0.25*         | 0.70*                                       | 0.25*                               | -0.08                           | 0.15*                                                | -0.08                                        | -0.04                                    |
|                                               |                    | (95% CI)           | (0.14, 0.36)  | (0.37, 1.02)                                | (0.16, 0.34)                        | (-0.24, 0.09)                   | (0.05, 0.25)                                         | (-0.17, 0.00)                                | (-0.53, 0.45)                            |
|                                               | Men                | Adjusted           | 0.13*         | 0.25*                                       | 0.09                                | -0.05                           | 0.05                                                 | -0.09 *                                      | -0.13*                                   |
|                                               |                    | (95% CI)           | (0.08, 0.19)  | (0.10, 0.40)                                | (-0.03, 0.20)                       | (-0.24, 0.14)                   | (-0.03, 0.13)                                        | (-0.18, -0.01)                               | (-0.26, -0.01)                           |
|                                               | Women              | Minimally adjusted | 0.24*         | 0.76*                                       | 0.25*                               | 0.02                            | 0.15                                                 | -0.08                                        | 0.22                                     |
|                                               |                    | (95% CI)           | (0.08, 0.41)  | (0.28, 1.23)                                | (0.15, 0.35)                        | (-0.17, 0.21)                   | (-0.02, 0.31)                                        | (-0.18, 0.03)                                | (-0.07, 0.52)                            |
| <b>IQ score (harmonized units)</b>            | Both sexes         | Adjusted           | 0.15*         | 0.19                                        | 0.11                                | 0.09                            | 0.07                                                 | -0.12*                                       | -0.07                                    |
|                                               |                    | (95% CI)           | (0.04, 0.27)  | (-0.02, 0.40)                               | (-0.07, 0.28)                       | (-0.16, 0.33)                   | (-0.08, 0.22)                                        | (-0.24, 0.00)                                | (-0.48, 0.33)                            |
|                                               | Men                | Minimally adjusted | 0.26*         | 0.64*                                       | 0.26*                               | -0.15*                          | 0.15*                                                | -0.16                                        | -0.28*                                   |
|                                               |                    | (95% CI)           | (0.12, 0.40)  | (0.19, 1.09)                                | (0.02, 0.49)                        | (-0.29, -0.01)                  | (0.03, 0.27)                                         | (-0.33, 0.01)                                | (-0.51, -0.06)                           |
|                                               | Women              | Adjusted           | 0.13*         | 0.32*                                       | 0.07                                | -0.12*                          | 0.04                                                 | 0.02                                         | -0.14*                                   |
|                                               |                    | (95% CI)           | (0.07, 0.19)  | (0.09, 0.54)                                | (-0.09, 0.23)                       | (-0.21, -0.02)                  | (-0.06, 0.14)                                        | (-0.19, 0.22)                                | (-0.27, -0.01)                           |
| Both sexes                                    | Minimally adjusted | 1.45*              | 3.24*         | 1.07*                                       | -0.37                               | 0.30                            | 0.08                                                 | -0.01                                        |                                          |
|                                               | (95% CI)           | (1.14, 1.76)       | (2.35, 4.13)  | (0.69, 1.46)                                | (-0.85, 0.12)                       | (-0.16, 0.75)                   | (-0.43, 0.59)                                        | (-1.63, 1.60)                                |                                          |
| Men                                           | Adjusted           | 0.74*              | 1.52*         | 0.16                                        | 0.05                                | -0.26                           | -0.19                                                | 0.04                                         |                                          |
|                                               | (95% CI)           | (0.35, 1.14)       | (0.96, 2.08)  | (-0.47, 0.78)                               | (-0.91, 1.00)                       | (-1.21, 0.69)                   | (-0.69, 0.32)                                        | (-0.50, 0.58)                                |                                          |
| Women                                         | Minimally adjusted | 1.33*              | 3.43*         | 0.96*                                       | -0.46                               | 0.28                            | 0.08                                                 | 0.88                                         |                                          |
|                                               | (95% CI)           | (0.88, 1.78)       | (2.29, 4.58)  | (0.42, 1.51)                                | (-1.01, 0.09)                       | (-0.28, 0.83)                   | (-0.48, 0.64)                                        | (-0.29, 2.05)                                |                                          |
| Both sexes                                    | Adjusted           | 0.70*              | 1.66*         | 0.00                                        | 0.00                                | -1.26                           | -0.27                                                | 0.18                                         |                                          |
|                                               | (95% CI)           | (0.14, 1.26)       | (1.04, 2.29)  | (-0.93, 0.92)                               | (-1.34, 1.33)                       | (-5.07, 2.55)                   | (-0.82, 0.29)                                        | (-1.57, 1.94)                                |                                          |
| Men                                           | Minimally adjusted | 1.57*              | 2.95*         | 1.18*                                       | -0.04                               | 0.35                            | 0.06                                                 | -0.77*                                       |                                          |
|                                               | (95% CI)           | (1.13, 2.00)       | (1.54, 4.36)  | (0.65, 1.72)                                | (-1.07, 1.00)                       | (-0.46, 1.16)                   | (-1.20, 1.32)                                        | (-1.48, -0.07)                               |                                          |
| Women                                         | Adjusted           | 0.78*              | 1.00          | 0.29                                        | 0.10                                | -0.19                           | 0.22                                                 | 0.03                                         |                                          |
|                                               | (95% CI)           | (0.23, 1.34)       | (-0.19, 2.19) | (-0.56, 1.15)                               | (-1.28, 1.48)                       | (-1.17, 0.79)                   | (-1.02, 1.46)                                        | (-0.54, 0.60)                                |                                          |

526 Data are presented as linear regression coefficients (95% Confidence Intervals). In minimally adjusted models, we controlled for sex in analysis including both  
527 sexes and in Guatemala analysis, we controlled for year at birth and intervention group variables. In fully adjusted analyses, we also controlled for maternal  
528 factors (height, age at childbirth, schooling), paternal schooling, birth order, and income/wealth quintiles. Additionally, we controlled for maternal skin color in  
529 both Brazil cohorts. IQ = intelligence quotient. \*p-values for associations < 0.05.  
530

531  
532

**Table 3. Adjusted associations between growth in childhood and the number of years of school attainment in adulthood, by study site and sex**

| Study site  | Sex        | Birth weight           | Conditional height at around 2 years of age | Conditional height in mid-childhood | Conditional height in adulthood | Conditional relative weight at around 2 years of age | Conditional relative weight in mid-childhood | Conditional relative weight in adulthood | N    |
|-------------|------------|------------------------|---------------------------------------------|-------------------------------------|---------------------------------|------------------------------------------------------|----------------------------------------------|------------------------------------------|------|
| Brazil 1982 | Men        | 0.23*<br>(0.08, 0.39)  | 0.45*<br>(0.16, 0.74)                       | -0.08<br>(-0.27, 0.10)              | -0.04<br>(-0.26, 0.18)          | 0.27*<br>(0.07, 0.46)                                | -0.05<br>(-0.22, 0.13)                       | -0.20*<br>(-0.40, -0.01)                 | 1456 |
|             | Women      | 0.22*<br>(0.03, 0.41)  | 0.51*<br>(0.30, 0.71)                       | 0.07<br>(-0.15, 0.30)               | -0.09<br>(-0.30, 0.12)          | -0.05<br>(-0.25, 0.15)                               | -0.01<br>(-0.19, 0.18)                       | -0.30*<br>(-0.50, -0.10)                 | 1500 |
|             | Both sexes | 0.23*<br>(0.10, 0.35)  | 0.48*<br>(0.30, 0.65)                       | 0.00<br>(-0.16, 0.15)               | -0.06<br>(-0.22, 0.09)          | 0.11<br>(-0.19, 0.42)                                | -0.03<br>(-0.16, 0.10)                       | -0.25*<br>(-0.39, -0.11)                 | 2956 |
| Brazil 1993 | Men        | 0.18*<br>(0.07, 0.29)  | -0.07<br>(-0.29, 0.15)                      | 0.34*<br>(0.09, 0.60)               | -0.18<br>(-0.54, 0.19)          | -0.11<br>(-0.35, 0.12)                               | -0.16<br>(-0.45, 0.13)                       | 0.01<br>(-0.25, 0.27)                    | 403  |
|             | Women      | 0.13*<br>(0.05, 0.21)  | 0.19<br>(-0.03, 0.41)                       | 0.22*<br>(0.01, 0.43)               | -0.14<br>(-0.35, 0.08)          | 0.05<br>(-0.12, 0.22)                                | -0.01<br>(-0.22, 0.19)                       | 0.03<br>(-0.20, 0.26)                    | 490  |
|             | Both sexes | 0.15*<br>(0.09, 0.22)  | 0.07<br>(-0.18, 0.33)                       | 0.28*<br>(0.11, 0.44)               | -0.15<br>(-0.36, 0.05)          | -0.02<br>(-0.18, 0.13)                               | -0.08<br>(-0.26, 0.09)                       | 0.02<br>(-0.15, 0.19)                    | 893  |
| Guatemala   | Men        | 0.35<br>(-0.21, 0.90)  | 0.58<br>(-0.18, 1.35)                       | -0.50<br>(-1.27, 0.28)              | 0.92*<br>(0.38, 1.47)           | -0.08<br>(-0.61, 0.46)                               | 0.29<br>(-0.38, 0.96)                        | -1.23*<br>(-1.70, -0.77)                 | 134  |
|             | Women      | 0.27<br>(-0.21, 0.76)  | -0.01<br>(-0.69, 0.67)                      | 0.35<br>(-0.09, 0.78)               | 0.15<br>(-0.40, 0.71)           | 0.18<br>(-0.74, 1.11)                                | 0.66<br>(-0.24, 1.56)                        | -0.51<br>(-1.15, 0.12)                   | 148  |
|             | Both sexes | 0.31<br>(-0.06, 0.67)  | 0.27<br>(-0.30, 0.85)                       | -0.05<br>(-0.87, 0.77)              | 0.52<br>(-0.24, 1.28)           | 0.07<br>(-0.50, 0.63)                                | 0.49<br>(-0.09, 1.07)                        | -0.83*<br>(-1.55, -0.12)                 | 282  |
| India       | Men        | 0.53*<br>(0.06, 0.99)  | 0.44<br>(-0.14, 1.01)                       | -0.13<br>(-0.74, 0.47)              | 0.10<br>(-0.61, 0.82)           | 0.56<br>(-0.04, 1.16)                                | -0.24<br>(-0.71, 0.24)                       | 0.08<br>(-0.82, 0.99)                    | 280  |
|             | Women      | -0.04<br>(-0.51, 0.42) | 0.89*<br>(0.30, 1.47)                       | 0.24<br>(-0.20, 0.68)               | -0.06<br>(-0.48, 0.35)          | 0.39*<br>(0.01, 0.77)                                | -0.37<br>(-0.74, 0.00)                       | -0.25<br>(-0.54, 0.04)                   | 243  |
|             | Both sexes | 0.26<br>(-0.30, 0.82)  | 0.65*<br>(0.20, 1.09)                       | 0.04<br>(-0.34, 0.42)               | 0.03<br>(-0.40, 0.45)           | 0.48*<br>(0.12, 0.85)                                | -0.30<br>(-0.60, 0.01)                       | -0.07<br>(-0.58, 0.43)                   | 523  |
| Philippines | Men        | 0.09<br>(-0.14, 0.31)  | 0.29*<br>(0.00, 0.57)                       | 0.23*<br>(0.00, 0.46)               | -0.17<br>(-0.42, 0.09)          | -0.06<br>(-0.31, 0.18)                               | -0.20<br>(-0.50, 0.10)                       | 0.41*<br>(0.11, 0.70)                    | 877  |



| Study site   | Sex                          | Birth weight          | Conditional height at around 2 years of age | Conditional height in mid-childhood | Conditional height in adulthood | Conditional relative weight at around 2 years of age | Conditional relative weight in mid-childhood | Conditional relative weight in adulthood | N    |
|--------------|------------------------------|-----------------------|---------------------------------------------|-------------------------------------|---------------------------------|------------------------------------------------------|----------------------------------------------|------------------------------------------|------|
| South Africa | Women                        | 0.11<br>(-0.16, 0.38) | 0.44*<br>(0.21, 0.67)                       | -0.01<br>(-0.19, 0.18)              | 0.01<br>(-0.20, 0.22)           | 0.12<br>(-0.16, 0.41)                                | -0.21<br>(-0.47, 0.05)                       | -0.09<br>(-0.32, 0.14)                   | 783  |
|              | Both sexes                   | 0.10<br>(-0.08, 0.27) | 0.36*<br>(0.17, 0.54)                       | 0.12<br>(-0.12, 0.36)               | -0.08<br>(-0.26, 0.09)          | 0.02<br>(-0.16, 0.21)                                | -0.20<br>(-0.40, 0.00)                       | 0.18<br>(-0.31, 0.67)                    | 1660 |
|              | Men                          | 0.00<br>(-0.12, 0.11) | -0.02<br>(-0.15, 0.11)                      | 0.18<br>(-0.01, 0.36)               | 0.22<br>(-0.01, 0.44)           | 0.05<br>(-0.09, 0.20)                                | -0.32<br>(-0.66, 0.03)                       | 0.47*<br>(0.08, 0.87)                    | 309  |
|              | Women                        | 0.10<br>(-0.02, 0.21) | 0.02<br>(-0.15, 0.19)                       | -0.16*<br>(-0.31, -0.02)            | -0.21*<br>(-0.37, -0.06)        | -0.04<br>(-0.28, 0.20)                               | 0.01<br>(-0.14, 0.17)                        | -0.02<br>(-0.23, 0.18)                   | 338  |
| All sites    | Both sexes                   | 0.05<br>(-0.05, 0.15) | 0.00<br>(-0.10, 0.11)                       | 0.00<br>(-0.33, 0.33)               | -0.01<br>(-0.43, 0.41)          | 0.00<br>(-0.14, 0.15)                                | -0.15<br>(-0.47, 0.17)                       | 0.21<br>(-0.27, 0.70)                    | 647  |
|              | Men                          | 0.15*<br>(0.04, 0.27) | 0.19<br>(-0.02, 0.40)                       | 0.11<br>(-0.07, 0.28)               | 0.09<br>(-0.16, 0.33)           | 0.07<br>(-0.08, 0.22)                                | -0.12*<br>(-0.24, 0.00)                      | -0.07<br>(-0.48, 0.33)                   | 3459 |
|              | I <sup>2</sup> statistic (%) | 54.5                  | 67.7                                        | 57.5                                | 70.7                            | 51.6                                                 | 0                                            | 88.4                                     |      |
|              | p-value Cochran's Q test     | 0.051                 | 0.008                                       | 0.038                               | 0.004                           | 0.067                                                | 0.566                                        | <0.001                                   |      |
| All sites    | Women                        | 0.13*<br>(0.07, 0.19) | 0.32*<br>(0.09, 0.54)                       | 0.07<br>(-0.09, 0.23)               | -0.12<br>(-0.21, -0.02)         | 0.04<br>(-0.06, 0.14)                                | -0.06<br>(-0.18, 0.07)                       | -0.14*<br>(-0.27, -0.01)                 | 3502 |
|              | I <sup>2</sup> statistic (%) | 0                     | 75.7                                        | 62.2                                | 0                               | 0                                                    | 34.2                                         | 34.9                                     |      |
|              | p-value Cochran's Q test     | 0.83                  | 0.001                                       | 0.021                               | 0.55                            | 0.436                                                | 0.179                                        | 0.175                                    |      |
|              | Both sexes                   | 0.13*<br>(0.08, 0.19) | 0.25*<br>(0.10, 0.40)                       | 0.09<br>(-0.03, 0.20)               | -0.05<br>(-0.24, 0.14)          | 0.05<br>(-0.03, 0.13)                                | -0.09*<br>(-0.18, -0.01)                     | -0.13*<br>(-0.26, -0.01)                 | 6961 |
| All sites    | I <sup>2</sup> statistic (%) | 16.3                  | 74.4                                        | 59.6                                | 56.2                            | 28.2                                                 | 12.9                                         | 78.8                                     |      |
|              | p-value Cochran's Q test     | 0.284                 | <0.001                                      | 0.004                               | 0.009                           | 0.169                                                | 0.319                                        | <0.001                                   |      |

533 Data are presented as linear regression coefficients (95% Confidence Intervals). Conditionals for all sites and site-specific were calculated using birth weight as  
534 anchor. In adjusted analyses, we controlled for maternal factors (height, age at childbirth, schooling), birth order, and income/wealth quintiles. Additionally, we  
535 controlled for year at birth and intervention group variables (in Guatemala analysis), and for maternal skin color (in both Brazil cohorts). These models exclude  
536 cases with missing values. The I<sup>2</sup> statistic and Cochran's Q test were used to quantify between-cohort variation. \*p-values for linear associations < 0.05.

537



**Table 4. Adjusted associations between growth in childhood and IQ in adulthood, by study site and sex**

| Study site  | Sex        | Birth weight           | Conditional height at around 2 years of age | Conditional height in mid-childhood | Conditional height in adulthood | Conditional relative weight at around 2 years of age | Conditional relative weight in mid-childhood | Conditional relative weight in adulthood | N    |
|-------------|------------|------------------------|---------------------------------------------|-------------------------------------|---------------------------------|------------------------------------------------------|----------------------------------------------|------------------------------------------|------|
| Brazil 1982 | Men        | 0.36<br>(-0.31, 1.03)  | 1.94*<br>(1.10, 2.79)                       | -0.15<br>(-0.89, 0.59)              | 0.32<br>(-0.80, 1.43)           | 0.58<br>(-0.17, 1.32)                                | -0.05<br>(-0.77, 0.67)                       | 0.48<br>(-0.21, 1.18)                    | 1445 |
|             | Women      | 1.26*<br>(0.59, 1.92)  | 1.13*<br>(0.32, 1.93)                       | 0.38<br>(-0.39, 1.15)               | -0.09<br>(-0.83, 0.64)          | -0.11<br>(-0.84, 0.62)                               | -0.26<br>(-1.04, 0.52)                       | -0.05<br>(-0.85, 0.75)                   | 1492 |
|             | Both sexes | 0.81<br>(-0.07, 1.69)  | 1.53*<br>(0.73, 2.33)                       | 0.12<br>(-0.41, 0.65)               | 0.11<br>(-0.56, 0.77)           | 0.24<br>(-0.44, 0.91)                                | -0.15<br>(-0.68, 0.38)                       | 0.22<br>(-0.31, 0.75)                    | 2937 |
| Brazil 1993 | Men        | 1.06*<br>(0.42, 1.70)  | 2.52*<br>(0.70, 4.34)                       | 1.62<br>(-0.25, 3.50)               | 0.46<br>(-1.05, 1.98)           | 0.40<br>(-1.90, 2.69)                                | -0.65<br>(-2.25, 0.96)                       | -0.80<br>(-2.71, 1.11)                   | 381  |
|             | Women      | 0.51<br>(-0.06, 1.09)  | 0.42<br>(-0.93, 1.77)                       | 1.36<br>(-0.09, 2.81)               | 0.12<br>(-1.40, 1.64)           | 0.88<br>(-0.60, 2.36)                                | 0.14<br>(-1.49, 1.78)                        | 0.21<br>(-1.33, 1.76)                    | 466  |
|             | Both sexes | 0.78*<br>(0.25, 1.31)  | 1.37<br>(-0.68, 3.41)                       | 1.48*<br>(0.32, 2.64)               | 0.27<br>(-0.81, 1.35)           | 0.66<br>(-0.65, 1.98)                                | -0.21<br>(-1.36, 0.94)                       | -0.24<br>(-1.45, 0.97)                   | 847  |
| Guatemala   | Men        | 2.04<br>(-0.19, 4.26)  | 2.21<br>(-0.44, 4.86)                       | -3.02<br>(-7.23, 1.18)              | 3.70*<br>(0.38, 7.03)           | -7.22*<br>(-8.00, -6.44)                             | -1.60<br>(-5.26, 2.06)                       | -2.33*<br>(-3.08, -1.58)                 | 130  |
|             | Women      | -0.74<br>(-2.54, 1.07) | -2.36<br>(-5.67, 0.94)                      | 1.09<br>(-1.78, 3.96)               | 1.76<br>(-1.87, 5.39)           | -2.66<br>(-5.59, 0.28)                               | 1.17<br>(-2.52, 4.87)                        | 0.23<br>(-1.87, 2.33)                    | 147  |
|             | Both sexes | 0.54<br>(-2.17, 3.25)  | -0.22<br>(-4.72, 4.29)                      | -0.84<br>(-4.84, 3.16)              | 2.67*<br>(0.19, 5.15)           | -4.66*<br>(-9.22, -0.11)                             | -0.05<br>(-2.79, 2.69)                       | -0.90<br>(-3.47, 1.68)                   | 277  |
| India       | Men        | NA                     | NA                                          | NA                                  | NA                              | NA                                                   | NA                                           | NA                                       | NA   |
|             | Women      | NA                     | NA                                          | NA                                  | NA                              | NA                                                   | NA                                           | NA                                       | NA   |
|             | Both sexes | NA                     | NA                                          | NA                                  | NA                              | NA                                                   | NA                                           | NA                                       | NA   |
| Philippines | Men        | -0.21<br>(-1.37, 0.95) | 0.55<br>(-0.78, 1.88)                       | 0.38<br>(-0.84, 1.60)               | -1.90*<br>(-3.10, -0.71)        | -0.29<br>(-1.48, 0.90)                               | 0.32<br>(-0.95, 1.58)                        | 1.31<br>(-0.27, 2.90)                    | 672  |
|             | Women      | 1.16<br>(-0.18, 2.50)  | 2.83*<br>(1.61, 4.05)                       | -1.18<br>(-2.49, 0.14)              | 2.00*<br>(0.44, 3.56)           | 0.70<br>(-0.70, 2.10)                                | -1.42*<br>(-2.81, -0.03)                     | 0.00<br>(-1.46, 1.45)                    | 576  |
|             | Both sexes | 0.42                   | 1.60                                        | -0.34                               | -0.10                           | 0.16                                                 | -0.47                                        | 0.71                                     | 1248 |

| Study site   | Sex        | Birth weight                 | Conditional height at around 2 years of age | Conditional height in mid-childhood | Conditional height in adulthood | Conditional relative weight at around 2 years of age | Conditional relative weight in mid-childhood | Conditional relative weight in adulthood | N      |
|--------------|------------|------------------------------|---------------------------------------------|-------------------------------------|---------------------------------|------------------------------------------------------|----------------------------------------------|------------------------------------------|--------|
| South Africa | Men        | (-0.92, 1.76)                | (-0.64, 3.84)                               | (-1.87, 1.19)                       | (-3.93, 3.73)                   | (-0.80, 1.12)                                        | (-2.18, 1.23)                                | (-0.58, 2.01)                            | 309    |
|              |            | 1.14                         | 1.43                                        | -1.37                               | -0.56                           | 0.41                                                 | -1.41                                        | 2.54*                                    |        |
|              | Women      | (-0.08, 2.36)                | (-0.31, 3.18)                               | (-3.55, 0.81)                       | (-2.24, 1.13)                   | (-1.24, 2.06)                                        | (-2.92, 0.09)                                | (0.87, 4.22)                             | 339    |
| All sites    | Both sexes | (-0.97, 3.12)                | (-1.47, 2.98)                               | (-1.27, 2.14)                       | (-5.20, -0.79)                  | (-3.89, 0.24)                                        | (0.77, 4.42)                                 | (-1.46, 1.57)                            | 648    |
|              |            | 1.11                         | 1.08                                        | -0.43                               | -1.83                           | -0.76                                                | 0.69                                         | 1.24                                     |        |
|              | Men        | (-0.12, 2.33)                | (-0.35, 2.51)                               | (-2.19, 1.33)                       | (-4.24, 0.57)                   | (-2.96, 1.44)                                        | (-3.25, 4.62)                                | (-1.19, 3.68)                            | 2937   |
|              |            | (0.14, 1.26)                 | (1.04, 2.29)                                | (-0.93, 0.92)                       | (-1.34, 1.33)                   | (-5.07, 2.55)                                        | (-0.82, 0.29)                                | (-1.57, 1.94)                            |        |
|              |            | I <sup>2</sup> statistic (%) | 38                                          | 4.2                                 | 42.3                            | 72.8                                                 | 98.3                                         | 2.8                                      | 91.7   |
|              |            | p-value                      | 0.168                                       | 0.383                               | 0.14                            | 0.005                                                | <0.001                                       | 0.391                                    | <0.001 |
|              |            | Cochran's Q test             |                                             |                                     |                                 |                                                      |                                              |                                          |        |
| All sites    | Women      | 0.78*                        | 1                                           | 0.29                                | 0.1                             | -0.19                                                | 0.22                                         | 0.03                                     | 3020   |
|              |            | (0.23, 1.34)                 | (-0.19, 2.19)                               | (-0.56, 1.15)                       | (-1.28, 1.48)                   | (-1.17, 0.79)                                        | (-1.02, 1.46)                                | (-0.54, 0.60)                            |        |
|              |            |                              | I <sup>2</sup> statistic (%)                | 32                                  | 68.6                            | 45                                                   | 72.2                                         | 53                                       | 68.1   |
|              |            | p-value                      | 0.208                                       | 0.013                               | 0.122                           | 0.006                                                | 0.075                                        | 0.014                                    | 0.998  |
|              |            | Cochran's Q test             |                                             |                                     |                                 |                                                      |                                              |                                          |        |
| All sites    | Both sexes | 0.74*                        | 1.52*                                       | 0.16                                | 0.05                            | -0.26                                                | -0.19                                        | 0.04                                     | 5957   |
|              |            | (0.35, 1.14)                 | (0.96, 2.08)                                | (-0.47, 0.78)                       | (-0.91, 1.00)                   | (-1.21, 0.69)                                        | (-0.69, 0.32)                                | (-0.50, 0.58)                            |        |
|              |            |                              | I <sup>2</sup> statistic (%)                | 27.7                                | 49.8                            | 38.8                                                 | 69.9                                         | 96.8                                     | 46.6   |
|              |            | p-value                      | 0.19                                        | 0.036                               | 0.1                             | <0.001                                               | <0.001                                       | 0.051                                    | <0.001 |
|              |            | Cochran's Q test             |                                             |                                     |                                 |                                                      |                                              |                                          |        |

540 Data are presented as linear regression coefficients (95% Confidence Intervals). NA=not available data (IQ not available in India). Conditionals for all sites and  
541 site-specific were calculated using birth weight as anchor. In adjusted analyses, we controlled for maternal factors (height, age at childbirth, schooling), birth  
542 order, and income/wealth quintiles. Additionally, we controlled for year at birth and intervention group variables (in Guatemala analysis), and for maternal skin  
543 color (in both Brazil cohorts). These models exclude cases with missing values. The I<sup>2</sup> statistic and Cochran's Q test were used to quantify between-cohort  
544 variation. IQ = Intelligence quotient. \*p-values for linear associations < 0.05.
